# Supplementary material for: Vascular-derived SPARC and SerpinE1 regulate interneuron tangential migration and accelerate functional maturation of human stem cell-derived interneurons
Source: eLife. 2021 Apr 27;10:e56063. doi: 10.7554/eLife.56063 (PMC8099424; doi:10.7554/eLife.56063)
Supplement: Figure 1—figure supplement 1—source data 1. [file elife-56063-fig1-figsupp1-data1.xlsx]

## Sheet: Sheet1
human fetal Dlx2 cortical counts				F1 fig supp 1: ...by MZ vs CP
15 pcw	17 pcw	22 pcw		15pcw	17pcw	22pcw	15pcw	17pcw	22pcw
590.5	1748.02	1709.5		MZ	MZ	MZ	CP	CP	CP
452.95	981.35	2205.6		1075.59	1288.29	2003.21	520.126	766.622	1321.87
583.092	1561.31	1486.18		450.854	2471.64	2219.13	453.542	468.406	2189.79
1148.12	1533.24	2067.44		741.957	2577.33	1539.74	547.42	614.021	1419.45
625.653	1141.51	2143.99		1842.43	2842.92	1860.62	956.692	541.068	2385.14
1086.89	2007.28	2168.58		1274.44	2087.46	1943.95	572.353	431.638	2429.74
1097.81	1044.39	2037.74		1178.51	3130.95	2221.12	1047.27	547.147	2122.81
1310.79	940.101	1422.37		1189.34	1832.66	2385.2	1058.85	893.674	1538.63
	1669.63	2626.87		2098.81	2057.05	1080.17	1095.49	766.006	1770.71
		1937.74			2877.26	2461.84		753.847	2773.12
		1428.13				1381.48			2340.24
						1263.24			1578.64
