# Supplementary material for: Vascular-derived SPARC and SerpinE1 regulate interneuron tangential migration and accelerate functional maturation of human stem cell-derived interneurons
Source: eLife. 2021 Apr 27;10:e56063. doi: 10.7554/eLife.56063 (PMC8099424; doi:10.7554/eLife.56063)
Supplement: Figure 1—figure supplement 2—source data 1. [file elife-56063-fig1-figsupp2-data1.xlsx]

## Sheet: Sheet1
F1 fig supp2B: MGE area vs. # migratory cells
area in square microns	e11.5 MGE # migratory cells
4108.39	2677
12018.9	4525
21345	5226
34680	5886
35058.7	4518
35805	8291
36371	4118
36981.3	4678
42781	2411
51575	5864.33
52865.7	5063
61045	11487
61510.8	4747
61695	4984
70165.3	5642
71569.7	8907
71591.5	4298
81094.7	11077
81639.5	9571
81651.9	13106
82494	6290
95995	5967
100020	4900
100914	9646
104613	6931
120887	10810.7
143309	12138
162069	18684.3
174763	18553
190498	17182
