# Supplementary material for: Vascular-derived SPARC and SerpinE1 regulate interneuron tangential migration and accelerate functional maturation of human stem cell-derived interneurons
Source: eLife. 2021 Apr 27;10:e56063. doi: 10.7554/eLife.56063 (PMC8099424; doi:10.7554/eLife.56063)
Supplement: Figure 1—source data 1. [file elife-56063-fig1-data1.xlsx]

## Sheet: Sheet1
F1D: % area of MGE isolectin signal
E10.5	E11.5	E12.5	E13.5	E14.5	E15.5
2.636	4.532	3.055	5.99	7.112	11.5
1.01	3.257	4.685	5.013	7.685	13.114
4.405	2.984	2.269	3.648	8.758	14.559
3.203	1.568	4.931	3.454	8.256	6.458
1.262	5.486	6.341
	8.006	8.783
		5.993
		4.368
		5.636
		2.84
		3.339
F1G: Apcdd1 isolectin % MGE area				F1H: Apcdd1 # calbindin+ neurons in cortex				F1I: Apcdd1 MGE vessel size
Apcdd1 control	Apcdd1 GOF	Apcdd1 LOF		Apcdd1 control	Apcdd1 GOF	Apcdd1 LOF		Apcdd1 control	Apcdd1 GOF	Apcdd1 LOF
19.054	11.58	24.079		401.667	212.286	371.667		201.623	52.2731	278.284
16.314	13.259	18.32		510.5	268.667	354		152.058	71.5172	396.393
16.584	13.972	16.163		289.75	188.2	363.5		178.832	30.709	371.045
11.838	21.042	12.821		322.5	216.167	380		123.472	57.1669	163.95
15.024	8.985	14.146		335	202.25	371.5		70.6251	80.1646	234.061
18.068	6.801	13.957		321.25	257.833	401.5		99.5027	125	396.932
9.494	8.859	26.051				385		101.982	67.7733	185.388
7.208	8.025	8.736				406		39.5535	40.1486	138.063
6.554	9.077	14.943				330.5		71.1299	315.754	298.778
6.72	9.725					420		57.5148	172.771
4.558	2.609					474.5		118.904	106.011
7.366	5.666					536		193.003	272.79
9.937	8.01					402.5		130.452	113.123
10.468	4.831					411		101.379	194.343
14.356	7.333					362.5		319.671	133.08
14.463	4.685					425.5		266.549	68.4924
11.947	11.609					543		236.487	52.2831
15.264	12.718					301		154.37	112.6
9.154	14.406							108.526	84.8874
12.178	17.768							104.412	56.5736
11.082	6.434							142.77	117.21
9.705	3.326							191.585	35.4993
11.604	4.686							153.994	25.5873
12.839	5.299							240.142	66.0337
12.691	5.882							179.747	44.6175
13.947	7.168							223.274	92.8962
	7.716							185.662	87.1265
	13.39							117.126	202.004
	11.595								148.293
	11.367								158.413
	13.846
