# Supplementary material for: Vascular-derived SPARC and SerpinE1 regulate interneuron tangential migration and accelerate functional maturation of human stem cell-derived interneurons
Source: eLife. 2021 Apr 27;10:e56063. doi: 10.7554/eLife.56063 (PMC8099424; doi:10.7554/eLife.56063)
Supplement: Figure 2—source data 1. [file elife-56063-fig2-data1.xlsx]

## Sheet: Sheet1
F2B: MGE explant migration by age					F2C: e11.5 vs. e14.5 MGE explants +/- EndoCM						F2D: e11.5 EndoCM controls					F2H: e11.5 MGE explant migration +/- EndoCM											F2G: e11.5 EndoCM Size Fractionation
E11.5	E12.5	E13.5	E14.5		e11 control	e11 pEndoCM	e11 Endo CM	e14 control	e14 EndoCM		e11 control	e11 Endo CM	e11 HEK CM	e11 boiled Endo CM			NB					EndoCM					NB	3kDa	10kDa	30kDa	50kDa	100kDa
2498	6236	14834	31026		0.954158	2.10395	1.49115	2.10649	3.71807		0.954158	1.49115	0.379876	0.437368		DIV1	0	3	0	1	2	0	0	0	0		0.970443	1.73172	1.15539	2.24783	1.37346	0.85546
4237	6289	12148	11266		1.32197	4.31139	1.22629	1.31379	3.16019		1.32197	1.22629	0.284504	0.505506		DIV2	47	28	73	7	36	96	140	6	40		1.02956	1.30441	1.86406	0.872777	1.32031	1.14177
4858	7799	10669	18943		0.723876	1.8493	1.42769	1.40101	4.96323		0.723876	1.42769	0.483525	1.54994		DIV3	102	131	211	24	40	545	454	305	268		0.908672	1.59582	1.46544	0.862397	1.14177	0.30987
3511	8046		10751		0.978665	1.48774	2.10395	1.61674	3.52553		0.978665	2.10395	0.754185			DIV4	1248	330	940	549	346	1812	2431	889	1562		0.97415		1.94151	1.61335	0.529768	1.36063
8807	10077		10647		1.02134	1.52056	4.31139	1.49065	2.87847		1.02134	4.31139	0.681665														1.11718		0.851436	0.61567	1.87087
					0.32396	1.34601	1.8493	1.89384	3.45003		0.32396	1.8493	1.01987																	1.54303
					1.33108	1.34979	0.731111	1.93425	3.61592		1.33108	0.731111	1.29959																	2.69217
					0.955381		1.75294	0.433527			0.955381	1.75294	1.53956
					1.04837		3.59942	1.52378			1.04837	3.59942	1.64529
					0.549681		3.21732				0.549681	3.21732	1.10611
					0.575928		2.90609				0.575928	2.90609	0.890139
					1.37533		1.34906				1.37533	1.34906
					1.84027		2.35776				1.84027	2.35776
					1.12294		2.87345				1.12294	2.87345
					0.877057		1.64145				0.877057	1.64145
					0.417546		0.54813				0.417546	0.54813
					0.818182		4.24341				0.818182	4.24341
					1.07346		2.89148				1.07346	2.89148
					1.05889		1.95046				1.05889	1.95046
					1.73531						1.73531
					0.896618						0.896618
					0.598161						0.598161
					0.886941						0.886941
					1.5149						1.5149
