# Supplementary material for: Vascular-derived SPARC and SerpinE1 regulate interneuron tangential migration and accelerate functional maturation of human stem cell-derived interneurons
Source: eLife. 2021 Apr 27;10:e56063. doi: 10.7554/eLife.56063 (PMC8099424; doi:10.7554/eLife.56063)
Supplement: Figure 3—source data 1. [file elife-56063-fig3-data1.xlsx]

## Sheet: Sheet1
F3D: western blot quantification of HEK CM and EndoCM
SPARC			SerpinE1
HEK CM	Endo CM		HEK CM	Endo CM
10813.7	17153.8		292.778	17673.5
13460.5	17132.2		390.021	16444
11504.8	32102.8		126.364	12581.5
8565.72	23646.3			13343.1
3489.42	28825
2085.08	24243
	11164.6
F3E: SPARC and SerpinE1 GOF in MGE explants
control	Sparc	SerpinE1
0.954158	2.38232	1.28526
1.32197	1.67585	1.37964
0.723876	1.43229	1.33908
0.978665	2.96005	1.88697
1.02134	1.48434	1.41988
0.417546	1.35951	3.21788
0.818182	1.46671	5.05751
1.07346		2.77155
1.05889		4.39093
1.73531
0.896618
0.598161
0.886941
1.5149
0.431507
2.04212
0.52637
F3F: SPARC and SerpinE1 LOF in MGE explants
Endo CM	Sparc LOF	SerpinE1 LOF	Combo LOF
1.49115	2.29584	0.935296	1.37842
1.22629	0.894943	0.313205	1.74408
1.42769	0.716456	2.83791	1.2548
2.10395	1.38291	2.3887	1.73493
4.31139	1.71498	1.60668	1.03973
1.8493	1.29749	0.594027	2.10445
1.75294	1.77719	1.942
3.59942	1.81324	1.55941
3.21732	1.14486	2.02293
2.90609	2.07055	1.48804
1.34906	1.74178	0.498835
2.35776		1.85171
2.87345		1.46507
1.64145		1.32157
4.24341		0.82089
2.89148		0.441781
1.95046		0.597603
1.50753
1.72158
1.40514
F3G: Organotypic Slice Culture Migration Counts
	NB					EndoCM				SPARC				Serpin E1
DIV1	0	3	0	1	2	0	0	0	0	0	1	0	0	0	0	0	0
DIV2	47	28	73	7	36	96	140	6	40	98	70	47	11	5	71	30	11
DIV3	102	131	211	24	40	545	454	305	268	443	221	332	435	439	719	370	534
DIV4	1248	330	940	549	346	1812	2431	889	1562	1405	1441	1416	611	1923	2901	1735	1913
F3H: Organotypic Slice Culture Migration Counts
	NB										pEndoCM												pEndoCM + SPARC Ab + SK216
DIV1	7	10	5	0	0	0	0	0	73	75	43	13	3	16	16	13	326	12	25	136	161	366	7	10	5	0	0	0	116	189	100	80	27	22
DIV2	67	79	121	17	33	8	325	213	82	69	175	121	14	48	161	78	607	243	121	182	329	341	67	79	121	17	33	8	275	159	157	60	103	101
DIV3	337	96	153	19	116	131	490	404	270	83	214	359	156	117	241	146	908	384	480	522	529	1731	337	96	153	19	116	131		533		707	352	719
DIV4	475	114	215	111	365	217	504	1423	334	325	444	755	599	219	547	1341	1705	957	689	465	437	1357	475	114	215	111	365	217	324	702	538	815	429	818
