# Supplementary material for: Vascular-derived SPARC and SerpinE1 regulate interneuron tangential migration and accelerate functional maturation of human stem cell-derived interneurons
Source: eLife. 2021 Apr 27;10:e56063. doi: 10.7554/eLife.56063 (PMC8099424; doi:10.7554/eLife.56063)
Supplement: Figure 4—figure supplement 1—source data 1. [file elife-56063-fig4-figsupp1-data1.xlsx]

## Sheet: Sheet1
F4 fig supp1C: hSC-interneuron in vitro migration
control in DiffA	control in combo	pre-treated in DiffA	pre-treated in combo
111.992	118.541	105.882	136.983
128.429	112.812	128.111	121.665
118.76	153.954	112.817	162.072
134.296	121.624	122.537	159.569
112.524	124.531	132.478	148.22
110.177	112.359	142.913	157.325
139.305	124.209	138.965	152.584
130.169	134.243	159.26	165.393
123.563	172.95	167.923	170.143
	129.199	124.863
