# Supplementary material for: Vascular-derived SPARC and SerpinE1 regulate interneuron tangential migration and accelerate functional maturation of human stem cell-derived interneurons
Source: eLife. 2021 Apr 27;10:e56063. doi: 10.7554/eLife.56063 (PMC8099424; doi:10.7554/eLife.56063)
Supplement: Figure 4—figure supplement 3—source data 1. [file elife-56063-fig4-figsupp3-data1.xlsx]

## Sheet: Sheet1
F4 fig supp3D: xenograft supplementary branching data
control			pre-treated
primary	secondary	tertiary	primary	secondary	tertiary
4	0	0	3	4	2
3	0	0	4	2	1
3	0	0	3	1	0
3	0	0	5	3	1
3	0	0	7	7	1
3	0	0	3	1	0
2	2	0	10	6	2
2	1	0	3	1	0
4	1	0	5	5	1
2	1	0	4	3	0
2	1	0	5	0	0
5	2	0	3	1	0
3	2	0	3	2	0
3	2	1	4	1	0
4	2	0	4	0	0
1	1	0	2	0	0
3	2	0	4	1	0
4	1	0	2	2	1
2	0	0	2	1	0
6	2	0	4	2	0
6	2	0	4	1	0
3	2	0	3	1	0
2	0	0	5	1	1
4	2	0	4	6	0
6	4	0	2	0	0
3	0	0	7	3	0
2	1	1	3	2	0
3	0	0	3	2	0
3	2	0	4	1	0
2	0	0	4	0	0
3	0	0	2	0	0
1	0	0	2	1	0
			1	0	0
			1	1	1
			5	2	0
			4	5	0
			4	0	0
			6	3	0
			6	2	2
			7	2	0
			5	1	0
			3	1	0
			6	2	1
			2	1	0
			6	0	0
			4	0	0
			5	1	0
			6	1	0
			4	0	0
			5	2	0
			4	0	0
			8	1	0
			3	0	0
			6	0	0
			6	0	0
			7	5	0
			2	3	0
			2	3	1
			5	0	0
			3	2	0
			2	1	0
			5	2	0
			3	4	1
			6	1	0
			2	0	0
