# Supplementary material for: Vascular-derived SPARC and SerpinE1 regulate interneuron tangential migration and accelerate functional maturation of human stem cell-derived interneurons
Source: eLife. 2021 Apr 27;10:e56063. doi: 10.7554/eLife.56063 (PMC8099424; doi:10.7554/eLife.56063)
Supplement: Figure 4—figure supplement 4—source data 1. [file elife-56063-fig4-figsupp4-data1.xlsx]

## Sheet: Sheet1
xenograft supplemental e-phys data 2-months post transplant
I-Na			max AP			max V			I/K peak/max			dV/dT			AP width at half max
untreated	pre-treated		untreated	pre-treated		untreated	pre-treated		untreated	pre-treated		untreated	pre-treated		untreated	pre-treated
1624	1624		6	10		13.24	11.5		3600	4126		56.7592	65.3036		4.02488	2.55584
835.6	835.6		8	3		-6	9		2433	3202		32.0415	48.2222		4.82279	5.11674
854.5	854.5		17	22		4	-10		2143	2003		29.91	25.3319		4.206	5.46357
1129	1129		4	10		8	9		2442	1504		70.197	52.1819		1.898	3.2838
1499	1499		23	14		11	29.5		3530	843.5		91.242	125.744		2.83717	1.62152
3698	3698		4	28		20	5.5		5836	4655		23.1919	95.5142		5.98803	2.22463
2641	2641		3	7		2.5	23		7743	4419		26.8538	31.126		4.59743	3.92077
1085.8	1085.8		16	19		8.5	7		3643	2800		38.4557	64.6933		3.02136	3.16513
2472	2472		0	10		4.5	17		3765	2944		89.4111	55.8438		2.08892	3.30417
646	646		4	3		12.5	14		1842	2718			60.4257			2.47247
295	295		20	11			14		2196	1809
1581	1581			3			-5		3676	2317
2497	2497			18					1780	3547
342	342								1231.7	3085
273.5	273.5								2110	1220
1321	1321								2572	3012
1916	1916									2118
	990.5
	604.2
	933
