# Supplementary material for: Vascular-derived SPARC and SerpinE1 regulate interneuron tangential migration and accelerate functional maturation of human stem cell-derived interneurons
Source: eLife. 2021 Apr 27;10:e56063. doi: 10.7554/eLife.56063 (PMC8099424; doi:10.7554/eLife.56063)
Supplement: Figure 4—source data 1. [file elife-56063-fig4-data1.xlsx]

## Sheet: F4C and D
F4C: xenograft migratory distance from graft site				F4D: xenograft morphology
control	combo pre-treated			total process length			branching
100.254	621.147			control	pre-treated		control	treated
1350.6	800.572			354.162	397.07		4	9
1346.15	94.0604			216.935	487.999		3	7
1331.83	122.998			126.104	310.406		3	4
127.211	225.709			114.322	538.578		3	9
1473.59	266.052			185.84	490.6		3	15
798.879	74.5848			190.603	154.768		3	4
119.283	178.392			330.75	509.207		4	18
1478.79	116.368			259.804	407.118		3	4
1366.78	106.24			315.013	901.874		5	11
771.218	254.685			173.134	667.917		3	7
1369.56	82.4824			64.121	390.853		3	5
1369.04	180.631			464.245	441.585		7	4
422.162	178.562			248.03	231.062		5	5
459.38	349.368			238.626	314.473		6	5
447.638	263.798			383.718	342.272		6	4
1342.35	197.187			331.27	184.361		2	2
635.678	76.955			316.09	174.94		5	5
1359.35	940.16			243.799	185.195		5	5
237.22	474.591			193.935	305.414		2	3
1320.1	243.63			356.198	734.94		8	6
711.49	429.124			442.226	399.628		8	5
1338.53	1083.83			180.657	153.192		5	4
389.269	1032.01			86.061	507.229		2	7
1495.41	385.242			428.286	522.095		6	10
784.181	628.362			338.007	82.548		10	2
94.8658	386.707			300.109	307.347		3	10
293.446	297.139			243.521	442.737		4	5
1375.98	411.423			99.036	272.359		3	5
178.175	4534.18			167.03	276.01		5	5
188.409	223.174			63.314	394.509		2	4
1471.29	196.959			107.049	58.556		3	2
113.29	1110.37			32.662	165.551		1	3
686.653	1289.52				83.87			1
342.217	682.085				329.057			3
176.973	4543.67				669.477			7
132.919	768.274				567.623			9
825.837	856.514				270.402			4
96.2738	57.1767				730.154			9
467.336	147.627				704.691			10
991.589	218.207				659.129			9
199.983	1266.39				409.25			6
58.9406	4454.89				198.551			4
503.609	876.448				387.686			9
2552.59	137.873				114.508			3
638.369	860.232				360.616			6
106.061	4489.49				222.383			4
405.591	133.663				324.707			6
57.7464	105.484				486.475			7
102.585	338.055				231.097			4
242.221	122.38				284.405			7
718.023	715.355				212.346			4
553.97	157.668				270.202			9
2374.16	878.61				172.321			3
228.378	565.934				241.447			6
849.445	400.827				196.289			6
1704.29	1266.35				782.095			12
287.799	3016.88				272.79			5
1016.82	192.159				351.509			6
572.388	335.564				485.763			5
42.3317	1027.94				366.448			5
1413.32	1219.87				153.159			3
659.727	89.888				444.819			7
144.44	79.0528				401.211			8
634.706	3030.25				273.915			7
148.848	1234.95				159.763			2
1139.94	1243.97
1942.08	91.5492
2130.77	1219.47
531.433	1250.53
800.477	1255.71
172.605	599.916
371.176	2977.31
1861.58	5101.64
294.48	1668.63
147.181	2976.64
275.192	113.4
1287.2	265.194
78.3572	3005.57
421.43	267.802
127.417	418.979
189.517	71.9317
1026.57	89.9402
95.869	1220.22
817.181	1174.37
821.787	313.644
116.714	2977.72
1134.5	1235.02
765.445	3022.89
178.279	407.104
137.982	2991.52
303.756	1167.99
544.938	538.554
619.533	3023.76
844.817	3042.22
404.958	235.936
792.217	228.282
562.422	804.033
783.53	873.698
850.105	2977.72
446.215	5419.8
457.524	2043.55
492.182	2748.66
81.9875	2977.72
438.631	250.524
535.644	828.072
105.476	168.234
861.229	231.703
742.662	1278.4
157.923	2996.48
719.657	237.258
620.199	613.795
823.39	564.638
529.42	1962.89
543.251	1469.79
612.731	1198.64
407.018	107.311
592.115	63.5381
788.448	2977.72
363.647	2791.57
438.995	82.6265
362.073	1398.25
	513.245
	214.666
	1260.72
	336.752
	145.243
	160.498
	394.694
	66.2496
	1239.37
	1251.97
	403.834
	2758.46
	607.001
	299.757

## Sheet: F4I-O (e-phys)
F4I-O: E-phys recordings of 2 month post-transplant cells
spontaneous event frequency			AP threshold			I-Na/I-K ratio			Vrest			capacitance			input resistance			Tau
untreated	pre-treated		untreated	pre-treated		untreated	pre-treated		untreated	pre-treated		untreated	pre-treated		untreated	pre-treated		untreated	pre-treated
0.655	0.397		-37.96	-40.25		0.451111	0.672176		-26	-32		19.98	16		1804.35	1771.9		91.7319	73.5452
0.0722	19.81		-40.5	-37.04		0.343444	0.380387		-12	-33		13.8	16.2		938.583	850.838		100.109	45.6657
3.13	0.4945		-27.62	-41.81		0.39874	0.585023		-40	-29		13	14.6		2720.96	701.59		112.209	47.0085
18.94	12.9		-36.75	-31.7		0.462326	0.294548		-25	-24		13.78	16.5		2540.14	2964.36		55.2187	53.3975
0.87	0.133		-36.38	-39.73		0.425	0.189686		-51	-23		13.61	10.2		800.456	802.178		71.1676	39.0002
0.63	0.022		-34.27	-42.48		0.633653	0.468958		-38	-27		19	20		1603.55	1218.3		54.942	47.7907
0.082	54		-32.1	-38.68		0.341082	1.14732		-22	-41		15.85	15		1319.78	837.06		87.3324	74.7305
0.0625	3.89		-35.1	-41		0.298051	0.514286		-45	-55		18	35		2869.68	1220.87		82.3089	52.324
0.188	0.167		-40.65	-36.9		0.451111	0.672176		-10	-56		9	15		1692.76	848.553		39.5536	35.1248
0.33	0.198			-44.46		0.343444	0.380387		-24	-54		5.5	8.6		4345.29	1540.94		37.8006	46.0702
	0.19			-41.63		0.39874	0.585023		-21	-27		12	10		1386.81	950.207			101.338
	0.39					0.462326	0.294548		-46	-26.5		6	10		1282.54	1419.19			52.1099
	0.774					0.425	0.189686			-40		7	33			1648.77			26.7557
	2.18					0.633653	0.468958			-37		16	14			794.983
						0.341082	1.14732			-20		8.5	17			885.034
						0.298051	0.514286						9
						0.656574	1.07065						12.35
						0.350706	0.406181
						0.134335	1.03759
						0.679271	0.520069
						0.192135	0.740908
						0.222051	0.663533
						0.626066	0.811885
						0.744946	0.200598
							0.44051
